# Supplementary material for: Novel phenyl-substituted pyrazinoporphyrazine complexes of rare-earth elements: optimized synthetic protocols and physicochemical properties
Source: Royal Society of Chemistry journal article supplement (doi:10.1039/c8nj05939j), 2019-01-01
Supplement: c8nj05939j1.pdf [file c8nj05939j1.pdf]

Supporting Information

**Novel phenyl-substituted pyrazinoporphyrazine complexes  
of rare-earth elements: optimized synthetic protocols and  
physicochemical properties**

A.D. Kosov<sup>a</sup>, T.V. Dubinina<sup>a,b@</sup>, N.E. Borisova,<sup>a,c</sup> A.V. Ivanov<sup>a</sup>, K.A. Drozdov<sup>a</sup>, S.A. Trashin<sup>d</sup>, K. De  
Wael<sup>d</sup>, M.S. Kotova<sup>a</sup>, and L.G. Tomilova<sup>a,b</sup>

[a] *Department of chemistry, Lomonosov Moscow State University, 119991 Moscow,  
Russian Federation.*

[b] *Institute of physiologically Active Compounds, Russian Academy of Science, 142432  
Chernogolovka, Moscow Region, Russian Federation.*

[c] *A.N. Nesmeyanov Institute of Organoelement Compounds Russian Academy of  
Science, 28 Vavilov Str. 119334 Moscow, Russian Federation*

[d] *AXES research group, University of Antwerp, 2020 Antwerp, Belgium.*

@Corresponding author E-mail: [dubinina.t.vid@gmail.com](mailto:dubinina.t.vid@gmail.com)

## Contents list

Figure S1.  $^1\text{H}$  NMR spectra of complexes **2a**, **2d**, **2f** in  $[\text{D}_5]\text{Py}$  and  $^1\text{H}$ - $^1\text{H}$  COSY NMR spectrum of complex **2b** in  $[\text{D}_7]\text{DMF}$ .

Figure S2. FT-IR spectra of ligand **4** in ZnSe.

Figure S3. Effect of the scan rate on the peak current  $\text{Red}_1$  and  $\text{Red}_1'$  (A) and the same voltammograms normalized on square root of the scan rate.

Table S1. Oxidation-reduction potentials  $E_{1/2}$  (V) for complex **2e** in comparison with analogous complexes.

Supporting references.

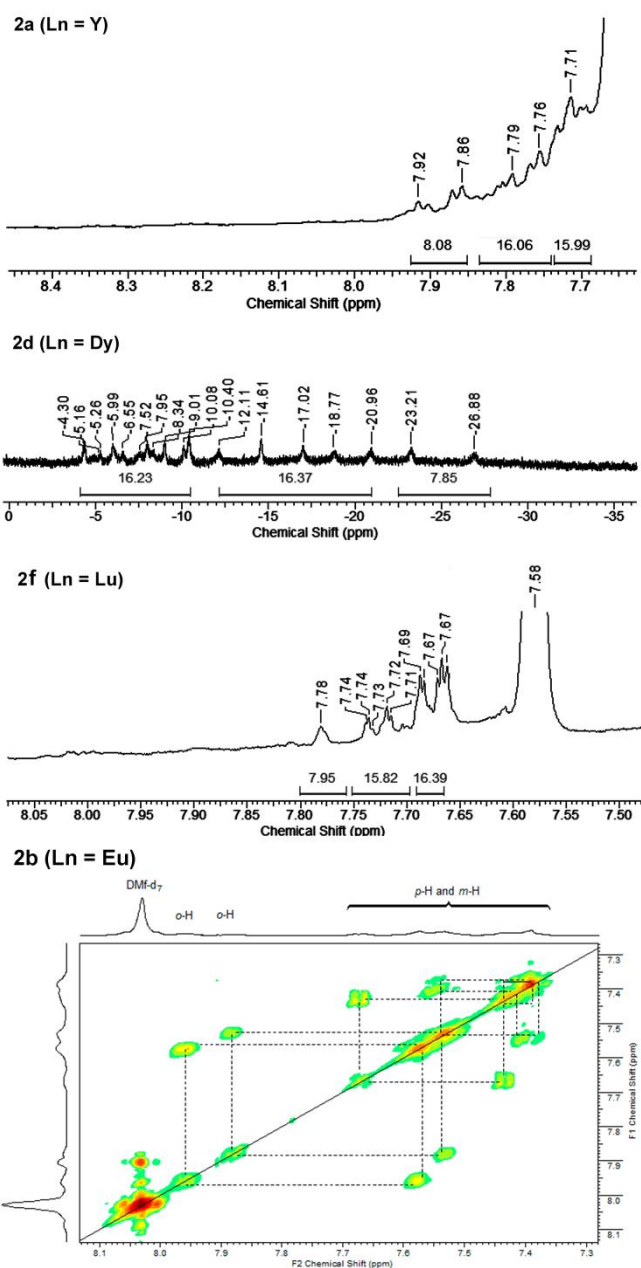

Figure S1.  $^1\text{H}$  NMR spectra of complexes **2a**, **2d**, **2f** in  $[\text{D}_5]\text{Py}$  and  $^1\text{H}$ - $^1\text{H}$  COSY NMR spectrum of complex **2b** in  $[\text{D}_7]\text{DMF}$ .

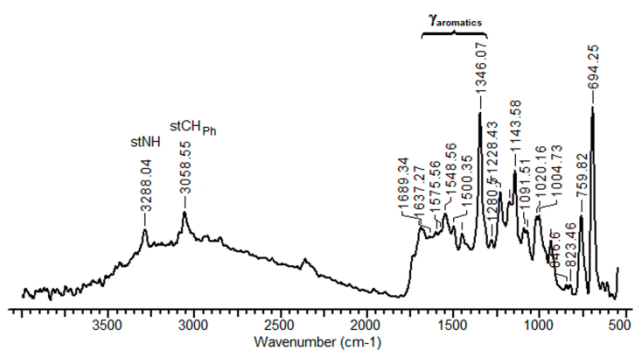

Figure S2. FT-IR spectra of ligand **4** in ZnSe.

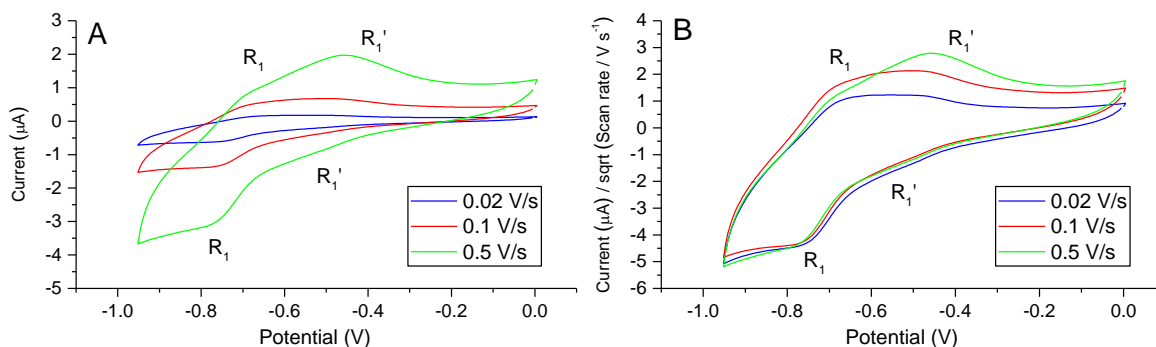

Figure S3. Effect of the scan rate on the peak current Red<sub>1</sub> and Red<sub>1</sub>' (A) and the same voltammograms normalized on square root of the scan rate.

Table S1. Oxidation-reduction potentials E<sub>1/2</sub> (V) for complex **2e** in comparison with analogous complexes.

| Compound                                 | Solvent                         | Red <sub>3</sub>     | Red <sub>2</sub> | Red <sub>1</sub> | Ox <sub>1</sub> | Ox <sub>2</sub> | Fc <sup>+</sup> /Fc    | ΔE <sub>Red1-Ox1</sub> | Reference |
|------------------------------------------|---------------------------------|----------------------|------------------|------------------|-----------------|-----------------|------------------------|------------------------|-----------|
| <b>2e</b>                                | Pyridine                        | -1.24                | -0.98            | -0.74            | +0.86           | +1.20           | 0.610                  | 1.60                   | This work |
| <sup>Ph8</sup> PcLuOAc                   | <i>o</i> -DCB                   | -                    | -1.32            | -0.85            | +0.75           | +1.44           | 0.640                  | 1.60                   | [1]       |
| <sup>Ph8</sup> DzPzZn                    | Pyridine                        | -1.33 <sup>[a]</sup> | -1.04            | -0.72            | +0.64           | +0.96           | 0.55 <sup>[b]</sup>    | 1.36                   | [2]       |
| <sup>Py8</sup> TPyzPzZn                  | Pyridine                        | -1.38 <sup>[c]</sup> | -0.72            | -0.34            | -               | -               | 0.55                   | -                      | [3,4]     |
| <sup>Py8</sup> TPyzPzMg                  | Pyridine                        | -1.43 <sup>[d]</sup> | -0.79            | -0.40            | -               | -               | 0.55                   | -                      | [3,4]     |
| <sup>Cl8</sup> TPyzPAH <sub>2</sub>      | DMSO                            | -0.89                | -0.38            | -0.04            | -               | -               | 0.465                  | -                      | [5]       |
| <sup>(C12H25)8</sup> PyzPAH <sub>2</sub> | CH <sub>2</sub> Cl <sub>2</sub> | -                    | -                | -0.41            | -               | -               | ca. 0.5 <sup>[e]</sup> | -                      | [6]       |

<sup>[a]</sup> two additional reduction process (Red<sub>4</sub> and Red<sub>5</sub>) observed at -1.49 and -1.72 V; <sup>[b]</sup> the value of 0.55 V for Fc<sup>+</sup>/Fc couple was reported in a followed publication of the same authors as in the original publication values were measured vs SCE; <sup>[c]</sup> two additional reduction processes (Red<sub>4</sub> and Red<sub>5</sub>) observed at -1.66 and -1.83 V; <sup>[d]</sup> additional reduction process (Red<sub>4</sub>) observed -1.70 V; <sup>[e]</sup> reported vs SCE, a recommended value for Fc<sup>+</sup>/Fc is given [7] as the value was reported vs SCE.

Abbreviations for the compounds:

**2e** = Octaphenyl-octaazaphthalocyaninato erbium(III) acetate

<sup>Ph8</sup>PcLuOAc = Octaphenyl-phthalocyaninato lutetium(III) acetate

<sup>Ph8</sup>DzPzZn = Tetrakis-2,3-(5,7-diphenyl-1,4-diazepino)porphyrizinato zinc(II)

<sup>Py8</sup>TPyzPzZn = Tetrakis-2,3-[5,6-di(2-pyridyl)pyrazino]porphyrizinato zinc(II)

<sup>Py8</sup>TPyzPzMg = Tetrakis-2,3-[5,6-di(2-pyridyl)pyrazino]porphyrizinato magnesium(II)

<sup>Cl8</sup>TPyzPAH<sub>2</sub> = Octachlorotetrapyrazinoporphyrazine

<sup>(C12H25)8</sup>PyzPAH<sub>2</sub> = Octadodecyltetrapyrazinoporphyrazine

### Supporting references:

- [1] T.V. Dubinina, K.V. Paramonova, S.A. Trashin, N.E. Borisova, L.G. Tomilova and N.S. Zefirov, *Dalton Transactions*, 2014, 43, 2799-2809.
- [2] M. P. Donzello, D. Dini, G. D'Arcangelo, C. Ercolani, R. Zhan, Z. Ou, P. A. Stuzhin and K. M. Kadish, *Journal of the American Chemical Society*, 2003, 125, 14190-14204.
- [3] C. Bergami, M. P. Donzello, F. Monacelli, C. Ercolani and K. M. Kadish, *Inorg. Chem.*, 2005, 44, 9862-9873.
- [4] M. P. Donzello, Z. Ou, D. Dini, M. Meneghetti, C. Ercolani and K. M. Kadish, *Inorg. Chem.*, 2004, 43, 8637-8648.
- [5] M. Hamdoush, S. S. Ivanova, O. I. Koifman, M. Kos'kina, G. L. Pakhomov and P. A. Stuzhin, *Inorg. Chim. Acta*, 2016, 444, 81-86.
- [6] K. Ohta, T. Watanabe, T. Fujimoto and I. Yamamoto, *J. Chem. Soc., Chem. Commun.*, 1989, DOI: 10.1039/C39890001611, 1611-1613.
- [7] I. Noviandri, K.N. Brown, D.S. Fleming, P.T. Gulyas, P.A. Lay, A.F. Masters and L. Phillips. *The Journal of Physical Chemistry B*, 1999, 103, 6713-22.
